# Supplementary material
Source: PubMed Central journal article supplement (PMC3785804)
Supplement: Supp_Fig1.pdf [file Supp_Fig1.pdf]

## Supplementary Data

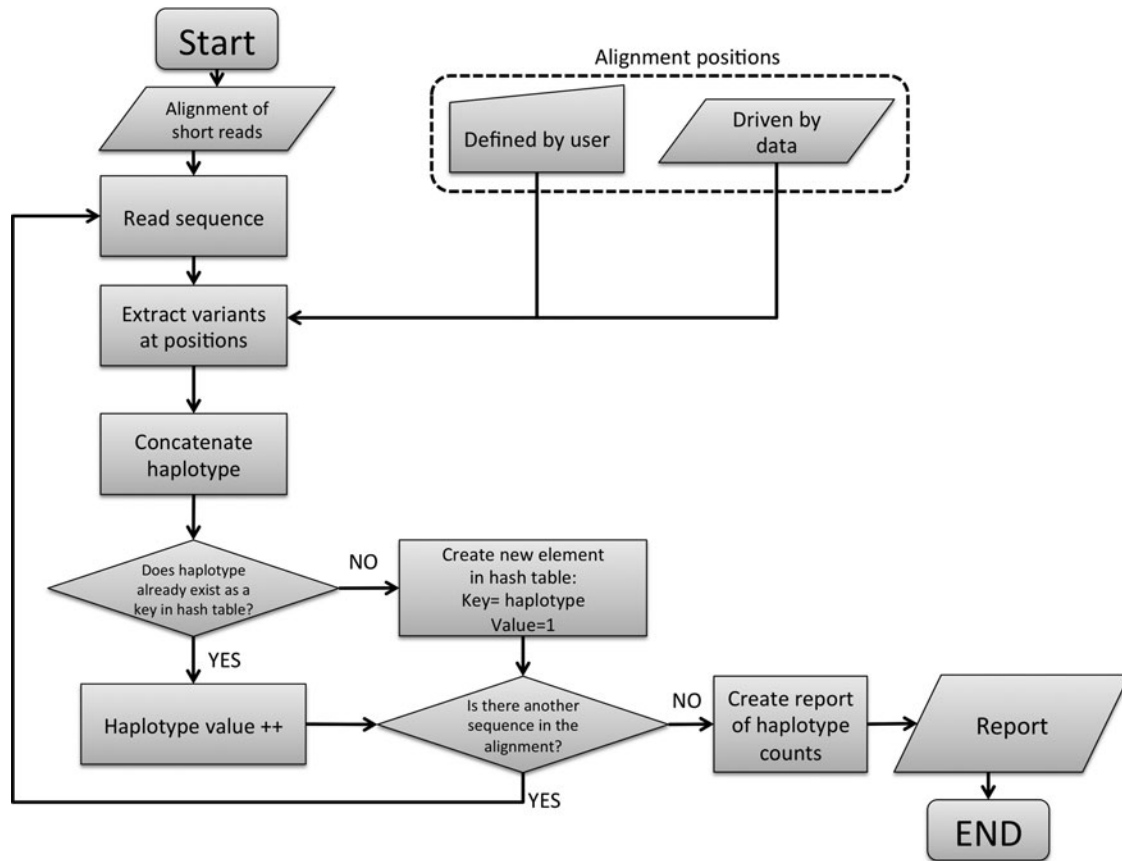

SUPPLEMENTARY FIG. S1. Flow chart of the algorithm implemented in DeepHaplo for the computation of haplotypes.
